# Supplementary material for: Oligosaccharides Modulate Rotavirus-Associated Dysbiosis and TLR Gene Expression in Neonatal Rats
Source: PubMed Central journal article supplement (PMC6721706; doi:10.3390/cells8080876), 2019-08-11
Supplement: cells-08-00876-s001.pdf [file cells-08-00876-s001.pdf]

SUPPLEMENTARY FIGURE 1

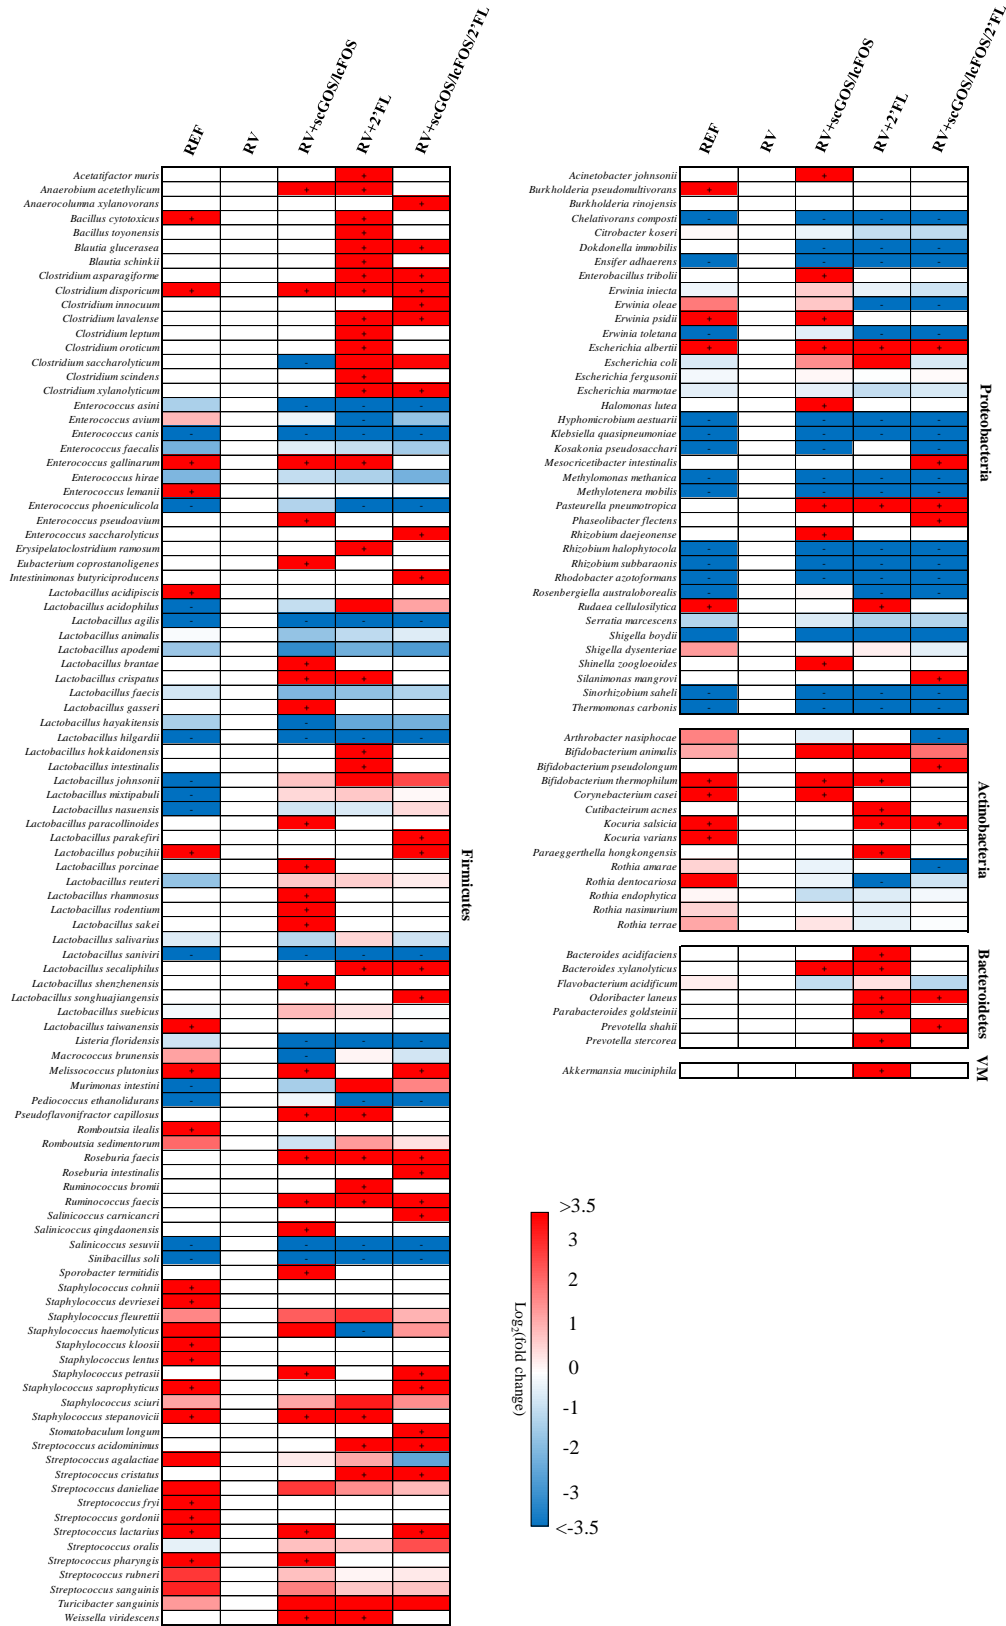

**Supplementary Figure 1.** Summary of species variation in fecal microbiota at the peak of diarrhea (day 8). A heat map of the mean relative abundances of the prominent OTUs assigned to the species level is represented. The rows represent the species and the columns the experimental groups. The  $\log_2$  of the fold change in respect to RV group was calculated and assigned a color following the legend. Species which were present in a group but not in the RV group were assigned the maximum variation ( $>3.5$ , marked with a "+"), whereas the genera which were present in RV group and not in the other groups were assigned the minimum variation ( $<-3.5$ , marked with a "-"). Results derived from  $n=3$ /group. VM: *Verrucomicrobia*.

The RV group showed higher abundance of *Lactobacillus* species (e.g. *Lactobacillus salivarius*,  $p<0.05$ ) than the REF group. Moreover, the infection decreased or excluded 7 species of *Staphylococcus* and 8 of *Streptococcus*. The supplementations partially counteracted some of these effects. scGOS/lcFOS induced the colonization of 9 new species of *Lactobacillus*, which were different from those present in the RV group. Moreover, the alteration of *Staphylococcus* and *Streptococcus* species found in RV group was not so apparent. In fact, scGOS/lcFOS supplementation prevented the exclusion of 3 species whereas enhanced the levels of 7 others to abundances similar as those in the REF group (e.g. *Staphylococcus haemolyticus* and *Streptococcus danieliae*). The supplementation with 2'FL promoted the colonization of several bacteria of the *Firmicutes* phyla, such as 7 different *Clostridium* species and 2 *Bacillus* species. The alteration of *Staphylococcus* and *Streptococcus* species was again not as intense as in the RV group. In addition, the RV infection promoted the colonization of numerous species belonging to the *Actinobacteria* and *Bacteroidetes* phyla. The mixture of scGOS/lcFOS and 2'FL seemed to combine the effects found separately for these oligosaccharides and interestingly, all oligosaccharides seemed to prevent the colonization of *Listeria floridensis*. Finally, the three supplementations were found to block the colonization of many species from the *Proteobacteria* phylum compared to the RV group (e.g. *Klebsiella quasipneumoniae* and *Rhodobacter azotoformans*), making them more similar to the REF group.
